# Supplementary material for: Exploration of the relationship between tumor mutation burden and immune infiltrates in colon adenocarcinoma
Source: PubMed Central journal article supplement (PMC7797534; doi:10.7150/ijms.51918), 2021-01-01

Supplementary Table 1. GSEA Pathway Enrichment Analysis in the high-TMB level group

| NAME                                                | p-val    | FDR qval |
|-----------------------------------------------------|----------|----------|
| KEGG_ANTIGEN_PROCESSING_AND_PRESENTATION            | 0        | 0.001771 |
| KEGG_NATURAL_KILLER_CELL_MEDIATED_CYTOTOXICITY      | 0.001927 | 0.024245 |
| KEGG_AUTOIMMUNE_THYROID_DISEASE                     | 0.007813 | 0.050245 |
| KEGG_SYSTEMIC_LUPUS_ERYTHEMATOSUS                   | 0.009881 | 0.05225  |
| KEGG_GRAFT_VERSUS_HOST_DISEASE                      | 0.00611  | 0.04818  |
| KEGG_LEISHMANIA_INFECTION                           | 0.012    | 0.052018 |
| KEGG_ASTHMA                                         | 0.009843 | 0.051692 |
| KEGG_INTESTINAL_IMMUNE_NETWORK_FOR_IGA_PRODUCTION   | 0.017751 | 0.062052 |
| KEGG_AMINO_SUGAR_AND_NUCLEOTIDE_SUGAR_METABOLISM    | 0.002041 | 0.05631  |
| KEGG_TOLL_LIKE_RECEPTOR_SIGNALING_PATHWAY           | 0.011976 | 0.061629 |
| KEGG_HEMATOPOIETIC_CELL_LINEAGE                     | 0.015296 | 0.064904 |
| KEGG_TYPE_I_DIABETES_MELLITUS                       | 0.017787 | 0.060479 |
| KEGG_VIRAL_MYOCARDITIS                              | 0.014028 | 0.059515 |
| KEGG_CYTOSOLIC_DNA_SENSING_PATHWAY                  | 0.003968 | 0.068157 |
| KEGG_ALLOGRAFT_REJECTION                            | 0.010081 | 0.064711 |
| KEGG_FRUCTOSE_AND_MANNANOSE_METABOLISM              | 0.026157 | 0.0754   |
| KEGG_P53_SIGNALING_PATHWAY                          | 0.012024 | 0.078547 |
| KEGG_PANTOTHENATE_AND_COA_BIOSYNTHESIS              | 0.006048 | 0.078132 |
| KEGG_CYTOKINE_CYTOKINE_RECEPTOR_INTERACTION         | 0.043726 | 0.111304 |
| KEGG_NOD_LIKE_RECEPTOR_SIGNALING_PATHWAY            | 0.025641 | 0.111987 |
| KEGG_APOPTOSIS                                      | 0.025948 | 0.115454 |
| KEGG_PANCREATIC_CANCER                              | 0.025263 | 0.118664 |
| KEGG_RIG_I_LIKE_RECEPTOR_SIGNALING_PATHWAY          | 0.035294 | 0.145911 |
| KEGG_PROTEIN_EXPORT                                 | 0.068762 | 0.140844 |
| KEGG_PRION_DISEASES                                 | 0.044776 | 0.147001 |
| KEGG_ONE_CARBON_POOL_BY_FOLATE                      | 0.05336  | 0.144019 |
| KEGG_CELL_CYCLE                                     | 0.08125  | 0.166653 |
| KEGG_SPHINGOLIPID_METABOLISM                        | 0.045908 | 0.171279 |
| KEGG_CHEMOKINE_SIGNALING_PATHWAY                    | 0.075547 | 0.169606 |
| KEGG_OOCYTE_MEIOSIS                                 | 0.068687 | 0.164303 |
| KEGG_DNA_REPLICATION                                | 0.0998   | 0.169833 |
| KEGG_GLYOXYLATE_AND_DICARBOXYLATE_METABOLISM        | 0.070565 | 0.175985 |
| KEGG_JAK_STAT_SIGNALING_PATHWAY                     | 0.067179 | 0.19455  |
| KEGG_GALACTOSE_METABOLISM                           | 0.064777 | 0.19121  |
| KEGG_T_CELL_RECEPTOR_SIGNALING_PATHWAY              | 0.102161 | 0.186753 |
| KEGG_GLYCOSAMINOGLYCAN_BIOSYNTHESIS_KERATAN_SULFATE | 0.10101  | 0.187394 |
| KEGG_HOMOLOGOUS_RECOMBINATION                       | 0.112016 | 0.19811  |
| KEGG_FC_EPSILON_RI_SIGNALING_PATHWAY                | 0.098837 | 0.235505 |
| KEGG_AMYOTROPHIC_LATERAL_SCLEROSIS_ALS              | 0.075547 | 0.250002 |
| KEGG_ETHER_LIPID_METABOLISM                         | 0.085066 | 0.245292 |
| KEGG_VEGF_SIGNALING_PATHWAY                         | 0.102823 | 0.271902 |

|                                                               |          |          |
|---------------------------------------------------------------|----------|----------|
| KEGG_CELL_ADHESION_MOLECULES_CAMS                             | 0.171079 | 0.26877  |
| KEGG_NUCLEOTIDE_EXCISION_REPAIR                               | 0.191617 | 0.266856 |
| KEGG_PROTEASOME                                               | 0.227545 | 0.277802 |
| KEGG_GLYCOSPHINGOLIPID_BIOSYNTHESIS_LACTO_AND_NEOLACTO_SERIES | 0.149897 | 0.278888 |
| KEGG_GLYCOLYSIS_GLUONEOGENESIS                                | 0.147475 | 0.27302  |
| KEGG_PYRIMIDINE_METABOLISM                                    | 0.162325 | 0.268264 |
| KEGG_PRIMARY_IMMUNODEFICIENCY                                 | 0.201581 | 0.278731 |
| KEGG_BLADDER_CANCER                                           | 0.14557  | 0.274716 |
| KEGG_CYSTEINE_AND_METHIONINE_METABOLISM                       | 0.137331 | 0.2857   |
| KEGG_MAPK_SIGNALING_PATHWAY                                   | 0.150101 | 0.292467 |
| KEGG_PURINE_METABOLISM                                        | 0.151052 | 0.291814 |
| KEGG_PROGESTERONE_MEDIATED_OOCYTE_MATURATION                  | 0.167689 | 0.288275 |
| KEGG_GLIOMA                                                   | 0.183128 | 0.313611 |
| KEGG_COLORECTAL_CANCER                                        | 0.174442 | 0.312966 |
| KEGG_GLYCOSAMINOGLYCAN_BIOSYNTHESIS_CHONDROITIN_SULFATE       | 0.243299 | 0.337829 |
| KEGG_PROSTATE_CANCER                                          | 0.196    | 0.334579 |
| KEGG_BASE_EXCISION_REPAIR                                     | 0.246063 | 0.335232 |
| KEGG_COMPLEMENT_AND_COAGULATION_CASCADES                      | 0.248062 | 0.338573 |
| KEGG_INOSITOL_PHOSPHATE_METABOLISM                            | 0.246436 | 0.333194 |
| KEGG_FC_GAMMA_R_MEDIATED_PHAGOCYTOSIS                         | 0.264463 | 0.335231 |
| KEGG_NITROGEN_METABOLISM                                      | 0.202479 | 0.336377 |
| KEGG_ALANINE_ASPARTATE_AND_GLUTAMATE_METABOLISM               | 0.213693 | 0.334495 |
| KEGG_GLYCINE_SERINE_AND_THREONINE_METABOLISM                  | 0.246493 | 0.336135 |
| KEGG_ARGININE_AND_PROLINE_METABOLISM                          | 0.221328 | 0.334264 |
| KEGG_SNARE_INTERACTIONS_IN_VESICULAR_TRANSPORT                | 0.246377 | 0.332902 |
| KEGG_B_CELL_RECEPTOR_SIGNALING_PATHWAY                        | 0.277014 | 0.3287   |
| KEGG_RENAL_CELL_CARCINOMA                                     | 0.261663 | 0.330464 |
| KEGG_MISMATCH_REPAIR                                          | 0.320866 | 0.339452 |
| KEGG_CHRONIC_MYELOID_LEUKEMIA                                 | 0.261224 | 0.342027 |
| KEGG_PATHWAYS_IN_CANCER                                       | 0.269618 | 0.348573 |
| KEGG_SMALL_CELL_LUNG_CANCER                                   | 0.311508 | 0.382805 |
| KEGG_ALZHEIMERS_DISEASE                                       | 0.316206 | 0.380826 |
| KEGG_NON_SMALL_CELL_LUNG_CANCER                               | 0.316116 | 0.391053 |
| KEGG_ALDOSTERONE_REGULATED_SODIUM_REABSORPTION                | 0.317365 | 0.403454 |
| KEGG_LEUKOCYTE_TRANSENDOTHELIAL_MIGRATION                     | 0.356275 | 0.408845 |
| KEGG_LONG_TERM_POTENTIATION                                   | 0.348162 | 0.412247 |
| KEGG_RNA_DEGRADATION                                          | 0.371486 | 0.411294 |
| KEGG_REGULATION_OF_ACTIN_CYTOSKELETON                         | 0.360248 | 0.413197 |
| KEGG_HUNTINGTONS_DISEASE                                      | 0.391667 | 0.412768 |
| KEGG_RNA_POLYMERASE                                           | 0.375746 | 0.416831 |
| KEGG_TYPE_II_DIABETES_MELLITUS                                | 0.371951 | 0.416821 |
| KEGG_LONG_TERM_DEPRESSION                                     | 0.374257 | 0.420801 |
| KEGG_PORPHYRIN_AND_CHLOROPHYLL_METABOLISM                     | 0.394892 | 0.416656 |
| KEGG_BASAL_TRANSCRIPTION_FACTORS                              | 0.388655 | 0.420075 |

|                                                     |          |          |
|-----------------------------------------------------|----------|----------|
| KEGG_GLYCOSAMINOGLYCAN_DEGRADATION                  | 0.396414 | 0.425598 |
| KEGG_BETA_ALANINE_METABOLISM                        | 0.41483  | 0.424407 |
| KEGG_PATHOGENIC_ESCHERICHIA_COLI_INFECTION          | 0.421505 | 0.444809 |
| KEGG_PHENYLALANINE_METABOLISM                       | 0.471774 | 0.478344 |
| KEGG_PARKINSONS_DISEASE                             | 0.484    | 0.483796 |
| KEGG_GLYCOSAMINOGLYCAN_BIOSYNTHESIS_HEPARAN_SULFATE | 0.482255 | 0.479549 |
| KEGG_LINOLEIC_ACID_METABOLISM                       | 0.557312 | 0.572343 |
| KEGG_REGULATION_OF_AUTOPHAGY                        | 0.626953 | 0.587292 |
| KEGG_O_GLYCAN_BIOSYNTHESIS                          | 0.662028 | 0.662246 |
| KEGG_SPLICEOSOME                                    | 0.612403 | 0.681184 |
| KEGG_FOCAL_ADHESION                                 | 0.678647 | 0.755411 |
| KEGG_TERPENOID_BACKBONE_BIOSYNTHESIS                | 0.757576 | 0.795974 |
| KEGG_OXIDATIVE_PHOSPHORYLATION                      | 0.767396 | 0.848829 |
| KEGG_ECM_RECEPTOR_INTERACTION                       | 0.760649 | 0.879225 |

---

Supplementary Table 1: Overlapped genes were identified between DEGs in the different TMB level groups and the IRGs obtained from ImmPort database

| Type             | Gene symbol |          |          |           |           |          |              |         |          |         |       |        |  |
|------------------|-------------|----------|----------|-----------|-----------|----------|--------------|---------|----------|---------|-------|--------|--|
| overlapped genes | AZGP1       | CD8A     | CD74     | CTSB      | CTSE      | FCER1G   | FCGRTHLA-DMA | HLA-DMB |          |         |       |        |  |
|                  | HLA-DOA     | HLA-DPA1 | HLA-DPB1 | HLA-DQA1  | HLA-DQA2  | HLA-DQB1 |              |         |          |         |       |        |  |
|                  | HLA-DRA     | HLA-DRB1 | HLA-DRB5 | HSPA2     | HSPA6     | ICAM1    | IFNG         | KIR2DL4 |          |         |       |        |  |
|                  | KLRC2       | CIITA    | MICB     | PSME1     | PSME2     | TAP1     | TAP2         | IFI30   | CD209    | ULBP3   | ULBP2 | RAET1E |  |
|                  | PI3         | REG3G    | CXCL14   | CXCL16    | CXCL10    | CXCL9    | CXCL5        | CXCL11  |          |         |       |        |  |
|                  | CXCL1       | CXCL13   | PF4      | CXCL3     | CCL13     | DEFB1    | CCL8         | COLEC10 | S100A8   |         |       |        |  |
|                  | S100A12     | MMP12    | TMSB15A  | SERPIND1  | S100P     | S100A2   | LCN12        |         |          |         |       |        |  |
|                  | S100A14     | S100A16  | IL6      | TGFB1     | PF4V1     | APOBEC3G | FABP6        | NOD2    | RBP1     |         |       |        |  |
|                  | TLR2        | PLAU     | IL1B     | PAEP      | MUC5AC    | PLTP     | MX1          | DDX58   | LBP      | R3HDML  |       |        |  |
|                  | OASL        | CRABP1   | OBP2B    | RBP2      | LCN15     | C8G      | NOX1         | APOD    | ORM2     | PML     | CYBB  |        |  |
|                  | ISG20       | DUOX2    | TLR3     | IFIH1     | LRP1      | IDO1     | STAT1        | SOCS3   | SEMG1    | SOCS1   |       |        |  |
|                  | IRF1        | IL15     | APOBEC3F | RARRES3   | CHIT1     | ISG15    | DHX58        | MUC4    | ELN      | LYZ     |       |        |  |
|                  | CCL5        | CST4     | JUN      | TLR8      | GNLY      | BST2     | PLA2G2A      | NOS2    | TLR1     | FGA     | MSR1  |        |  |
|                  | ROBO3       | SLC11A1  | DMBT1    | TNFRSF10A | CCL4      | APOBEC3H | TMPRSS6      |         |          |         |       |        |  |
|                  | MARCO       | TNFSF11  | CLDN4    | IL17A     | APOBEC3A  | IL7R     | SYTL1        | PTGS2   | CD14     |         |       |        |  |
|                  | PROC        | TRIM22   | RSAD2    | PDCD1     | AQP9      | FASLG    | GBP2         | CCL18   | CCL26    | CCL4L2  |       |        |  |
|                  | CCL7        | CCL3     | CCR5     | CCL3L1    | CCR1      | CCL24    | XCL2         | CXCR4   | CXCR6    | IL10    | PPARG |        |  |
|                  | FGR         | JAK2     | CD86     | HCK       | OLR1      | RNASE2   | LYN          | VAV3    | RAC2     | RAC3    | CHP2  |        |  |
|                  | NFATC1      | NFATC2   | CARD11   | PIK3R5    | PIK3CD    | CD72     | LILRB3       |         |          |         |       |        |  |
|                  | FCGR2B      | CX3CL1   | EDN1     | PROK2     | SAA1      | SAA2     | SEMA3C       | SEMA4B  |          |         |       |        |  |
|                  | SEMA5A      | TNC      | TYMP     | C5AR1     | CMKLR1    | EDNRB    | FPR1         | FPR2    | GPR17    |         |       |        |  |
|                  | PLXNB1      | PLXNC1   | PTAFR    | ROBO2     | ADM       | AGT      | AMELX        | AMH     |          |         |       |        |  |
|                  | AREG        | BMP3     | BMP5     | BMP7      | CALCA     | CCK      | CD70         | CHGA    | CHGB     | CMTM2   |       |        |  |
|                  | CSF1        | CSF2     | CSPG5    | DKK1      | EREG      | FAM3B    | FAM3D        | FGF18   | FGF20    | FGF3    |       |        |  |
|                  | GCG         | GDF10    | GDNF     | GREM2     | GRP       | GUCA2A   | IGF2         | IL17C   | IL1RN    | IL24    |       |        |  |
|                  | IL34        | INHBB    | INSL5    | KL        | LEFTY1    | LEFTY2   | NODAL        | NRG1    | NRTN     |         |       |        |  |
|                  | NTS         | NUDT6    | OSM      | PDGFD     | PDGFRL    | REG1A    | RETN         | RETNLB  |          |         |       |        |  |
|                  | RLN2        | SCT      | SECTM1   | SPP1      | STC1      | TAC1     | TDGF1        | TG      | TNFSF13B | TNFSF14 |       |        |  |
|                  | TNFSF9      | UCN2     | ADRB1    | AVPR1A    | C3AR1     | CSF1R    | CSF2RB       | CSF3R   |          |         |       |        |  |
|                  | EPOR        | FGFR2    | FGFR3    | FGFR4     | GHR       | GIPR     | HNF4A        | IL10RA  | IL12RB1  | IL18R1  |       |        |  |
|                  | IL18RAP     | IL1R2    | IL21R    | IL22RA1   | IL23R     | IL2RA    | IL2RB        | LGR5    | MTNR1A   |         |       |        |  |
|                  | NPR3        | NR112    | NR4A2    | NR6A1     | NRP1      | PRLR     | PTGER1       | PTGER2  | RARA     | S1PR2   |       |        |  |
|                  | SSTR5       | TGFBR2   | THRB     | TNFRSF10D | TNFRSF11A | TNFRSF18 | TNFRSF19     |         |          |         |       |        |  |
|                  | TNFRSF9     | VIPR1    | ITGAL    | ITGB2     | TYROBP    | LCK      | FCGR3A       | FCGR3B  |          |         |       |        |  |
|                  | CD247       | LCP2     | PLCG1    | FYN       | HCST      | CD48     | CD244        | PRKCG   | SH2D1A   | FAS     |       |        |  |
|                  | PRF1        | CD3D     | CD3E     | CD3G      | PTPRC     | ITK      | NCK2         | ICOS    | CTLA4    | RASGRP1 |       |        |  |

Supplementary Figure 1: Kaplan-Meier survival curves showed no statistically significant differences between the high- and low-TMB groups.

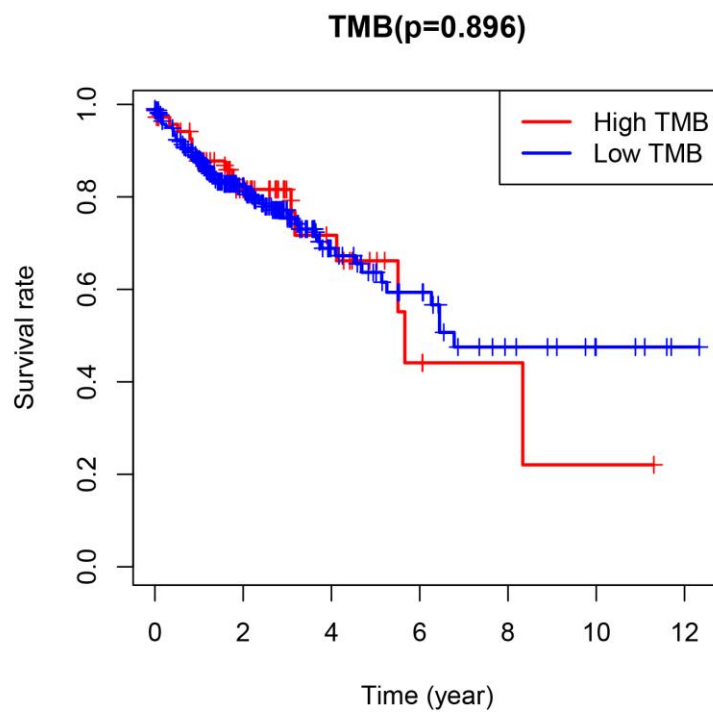

Supplement: ijmsv18p0685s1.pdf [file ijmsv18p0685s1.pdf]
